# Supplementary material
Source: publisher figshare collection journal article supplement (https://gsapubs.figshare.com/articles/dataset/_/25927120)
Supplement: Supplementary file 1 [file 1]

## Sheet: S1
Table S1. Trace element results of the analyzed profiles in cassiterite from the Yunling deposit.
	Spot No.	Al27	Sc45	Ti49	V51	Fe57	Co59	Ni60	Ga69	Zr90	Nb93	Sb121	Hf178	Ta181	W182	Pb208	Th232	U238
		µg/g	µg/g	µg/g	µg/g	µg/g	µg/g	µg/g	µg/g	µg/g	µg/g	µg/g	µg/g	µg/g	µg/g	µg/g	µg/g	µg/g
Profile aa'	1	113.846	1.51055	71.261	0.958748	1219.5	13.2469	84.9716	2.02447	2.76933	0.391381	2.27305	bdl	0.0804448	4.9145	bdl	bdl	0.412105
	2	80.7377	1.10404	53.6098	0.970488	908.065	12.8412	84.6518	1.51832	2.40557	0.417093	1.80974	bdl	0.13812	4.13222	0.0967474	bdl	0.293328
	3	43.5927	0.647367	52.1902	0.790175	450.868	13.5291	81.1894	0.808735	2.54068	0.423201	1.4789	0.16704	bdl	2.22791	bdl	bdl	0.091249
	4	104.6	1.43836	64.911	1.41999	1118.12	12.8251	80.9565	2.02119	1.52946	0.898006	2.5254	bdl	bdl	4.84928	bdl	bdl	0.464407
	5	118.058	1.73462	72.0636	1.24869	1235.66	12.34	85.1571	2.33361	1.55809	1.05212	2.01114	bdl	0.158635	5.51124	bdl	bdl	0.6557
	6	112.997	1.3968	82.3828	0.990188	1194.65	11.8106	86.9373	2.13162	1.74535	1.08224	2.04696	bdl	0.0834002	4.33434	bdl	bdl	0.402233
	7	61.031	0.575671	52.0831	0.44301	615.707	12.4184	85.0578	0.813016	1.19881	1.10935	2.34248	bdl	bdl	12.5966	bdl	bdl	0.328392
	8	120.858	0.586008	50.6529	bdl	1257.64	12.2957	85.6837	1.876	3.00843	0.463372	1.85664	bdl	0.175067	4.5257	0.115559	bdl	0.590164
	9	97.5643	0.671119	55.163	0.422564	996.552	12.4853	81.8133	1.50233	2.55634	0.647953	1.65638	bdl	0.181105	4.57559	bdl	bdl	0.320906
	10	94.2682	1.31941	88.3064	1.05723	908.619	12.3802	87.2512	1.92543	2.25505	1.35883	2.38805	bdl	0.214157	2.78986	bdl	bdl	0.351525
	11	109.274	1.4565	61.8526	0.579191	1093.91	13.3665	82.1907	1.64679	2.63357	1.27286	1.74614	0.30969	0.25607	3.8301	bdl	bdl	0.34435
	12	103.556	0.723196	49.5715	0.26967	1079.92	12.4136	81.2129	1.4945	4.10308	0.496104	2.28505	bdl	0.238525	3.57166	bdl	bdl	0.408513
	13	100.252	0.86155	82.5638	0.465377	980.787	12.4755	86.6511	1.89981	4.08621	0.800184	2.1837	bdl	0.309858	4.20108	bdl	bdl	0.401824
	14	42.0084	bdl	31.9594	bdl	471.98	12.9444	89.7664	0.675878	7.19683	0.300513	1.77029	0.480489	0.339176	2.00035	bdl	bdl	0.0810618
	15	100.886	bdl	43.8184	0.292644	1047.72	13.2019	89.1924	1.51601	3.68568	0.429769	2.85768	bdl	0.220344	3.70605	bdl	bdl	0.417498
	16	66.4884	0.368643	20.6434	0.2515	734.891	14.3662	86.1604	1.13628	3.48459	0.2875	1.90395	bdl	0.155825	2.10888	bdl	bdl	0.241406
	17	50.1334	bdl	32.6895	0.256252	586.667	13.7702	81.9951	0.557193	5.04974	0.352437	1.44935	bdl	0.209272	2.24991	0.139027	bdl	0.100201
	18	44.979	0.39352	29.8529	0.2781	542.97	13.9683	81.7822	0.543672	4.3214	0.258423	2.23286	bdl	bdl	1.77678	bdl	bdl	0.095699
	19	57.2317	bdl	31.4472	0.393866	620.694	13.7524	88.8991	0.743845	3.31629	0.378782	1.81863	bdl	0.135948	11.9516	bdl	bdl	0.0834277
	20	64.0919	0.518031	25.9689	0.464318	806.027	14.1352	86.6275	1.2876	2.914	bdl	1.61957	bdl	0.193343	2.11992	bdl	bdl	0.152029
	21	64.0467	bdl	29.9824	bdl	673.775	13.4764	90.5494	0.744374	2.10359	0.229154	2.06536	bdl	bdl	1.72867	bdl	bdl	0.109657
	22	61.3753	bdl	17.7342	bdl	690.718	12.8677	86.5684	1.62574	2.17398	0.342684	1.8586	bdl	0.169366	2.29661	bdl	bdl	0.111185
	23	42.874	bdl	16.9439	bdl	477.493	13.267	88.0187	0.714423	2.29719	bdl	1.58198	0.225672	0.135316	3.4844	bdl	bdl	0.0936701
	24	48.1879	bdl	12.9239	0.206502	564.107	12.5471	85.181	0.528074	2.2627	0.236902	1.43761	0.219829	0.200135	1.87295	bdl	bdl	0.0995648
	25	43.7924	bdl	13.3229	0.283521	468.006	13.0584	89.8857	0.469267	2.36886	0.211333	1.36964	bdl	bdl	2.09603	0.0441575	bdl	0.142515
	26	39.2941	bdl	13.2504	bdl	425.451	13.4299	89.811	0.65034	1.85206	0.224134	1.68138	0.327019	bdl	1.61999	bdl	bdl	0.0730701
	27	64.6659	bdl	13.4139	bdl	656.645	12.8858	87.8758	0.976008	1.07344	0.158739	1.43717	bdl	bdl	2.90415	0.0502686	bdl	0.273336
	28	66.4597	bdl	16.8925	bdl	727.445	12.6805	91.2846	0.77314	1.58546	0.180795	1.54867	bdl	0.116793	3.13331	bdl	bdl	0.290976
	29	65.5212	bdl	14.1663	0.262075	724.702	12.3552	87.6605	0.948476	2.12856	bdl	1.94113	bdl	bdl	2.53106	bdl	bdl	0.114613
	30	58.4468	bdl	14.5205	bdl	591.887	12.0308	81.3442	0.833558	2.02555	bdl	2.04247	bdl	0.112224	1.63908	bdl	bdl	0.139679
	31	45.0246	bdl	12.266	bdl	495.636	12.5401	85.9536	0.99645	1.937	0.173507	1.39815	bdl	bdl	1.6144	bdl	bdl	0.12296
	32	48.4495	bdl	19.3726	0.328534	544.18	12.6686	90.6738	1.01919	2.34319	0.287227	1.19296	bdl	bdl	1.93488	bdl	bdl	0.0322476
	33	41.0018	bdl	9.55769	bdl	447.549	13.1035	89.1142	0.719437	1.48048	0.267024	1.8544	bdl	bdl	1.59077	bdl	bdl	0.0507304
	34	41.2668	bdl	4.48249	bdl	491.786	12.9425	81.4098	0.719151	2.64781	0.172835	1.6606	bdl	0.138003	1.30882	bdl	bdl	0.101343
	35	51.9223	bdl	5.99241	0.21502	569.593	12.4458	86.9375	0.771591	3.46874	bdl	1.85228	bdl	0.198185	1.89874	bdl	bdl	0.0970448
	36	31.0863	bdl	11.1727	bdl	273.081	12.6801	89.376	0.32137	2.55013	0.209751	1.36065	bdl	0.069642	1.74274	0.116107	bdl	0.0481776
	37	60.0409	bdl	17.4829	bdl	593.477	12.8754	86.5889	0.682946	4.4113	bdl	1.72499	bdl	bdl	2.71226	0.0885388	bdl	0.115712
	38	30.1451	bdl	18.3327	bdl	291.736	12.9994	88.5858	0.643203	4.58622	0.17851	1.16686	bdl	0.0970133	1.47272	bdl	bdl	0.0677514
	39	29.9182	bdl	26.9419	bdl	298.787	12.8609	87.9201	0.343582	4.06502	0.156592	1.40368	bdl	0.0824974	1.38008	bdl	bdl	0.0272779
	40	42.6389	bdl	12.3344	bdl	423.234	13.5718	85.3946	0.576922	3.4101	0.129549	1.79935	0.330894	bdl	1.1705	bdl	bdl	0.0670116
	41	35.189	bdl	15.4915	bdl	307.256	13.0933	86.6264	0.682282	2.3876	0.15557	1.65566	bdl	bdl	1.28065	bdl	bdl	0.0779586
	42	33.3839	bdl	10.6666	bdl	350.948	13.4418	88.6171	0.630265	3.82096	0.169331	1.62729	bdl	0.0994484	1.26149	bdl	bdl	0.0428721
	43	36.3628	bdl	8.8117	bdl	361.34	12.8721	85.0537	0.64411	3.40217	bdl	0.896921	0.26348	bdl	1.30172	bdl	bdl	0.0596516
	44	21.9948	bdl	15.4877	bdl	214.504	13.6321	88.8173	bdl	4.16151	bdl	1.29439	0.343533	bdl	0.710991	bdl	bdl	0.0350885
	45	14.0963	bdl	27.5288	0.320085	126.038	13.6877	86.1217	bdl	6.52309	bdl	1.76767	0.429813	bdl	0.372458	bdl	bdl	0.01143
	46	24.2005	bdl	17.6438	0.275338	267.77	13.3937	87.2874	0.361479	3.22631	bdl	1.57614	bdl	bdl	0.754531	bdl	bdl	0.0516153
	47	20.7923	bdl	18.561	bdl	230.02	12.5408	86.8911	0.36145	3.38087	0.11787	1.80913	0.355079	bdl	0.778866	bdl	bdl	0.0222794
	48	18.0384	bdl	10.7067	bdl	207.743	12.8425	89.3521	0.36013	4.69028	bdl	1.5571	bdl	bdl	0.672583	bdl	bdl	0.0806584
	49	21.2523	bdl	9.44132	bdl	209.654	13.0625	92.3057	0.457509	4.65959	bdl	1.66233	bdl	bdl	bdl	bdl	bdl	bdl
	50	15.2202	bdl	19.6404	bdl	149.503	13.8957	85.2145	0.429405	4.03526	bdl	1.35557	bdl	bdl	0.61885	bdl	bdl	0.0559503
	51	16.6608	bdl	15.6243	0.213021	162.888	12.3023	86.5312	0.260985	3.34398	bdl	1.66994	bdl	bdl	bdl	bdl	bdl	0.0117659
	52	13.5431	bdl	52.5658	0.413923	154.655	13.1734	88.5382	0.25416	4.12734	0.226497	1.63706	bdl	0.0698679	0.421101	bdl	bdl	bdl
	53	9.68603	0.851809	272.818	0.760387	128.235	12.8229	88.9541	bdl	16.9997	0.402384	1.47686	0.828094	0.0926439	0.369027	bdl	bdl	0.0108323
	54	7.86262	1.26774	262.749	0.813799	103.257	12.565	83.9022	0.298885	24.389	3.24561	1.6073	1.37284	0.733552	bdl	bdl	bdl	0.0272319
	55	9.37722	1.01654	205.062	1.25388	140.115	11.9276	86.2361	bdl	25.9504	0.643296	1.40478	1.45778	0.311698	0.501742	bdl	bdl	0.05172
	56	10.9473	1.53362	64.6324	0.516551	141.026	13.6125	90.6291	0.322862	8.09865	0.146839	1.58551	0.485399	bdl	bdl	0.0977332	bdl	0.0279179
	57	11.3363	1.72152	93.1761	0.81833	176.285	12.7855	88.2059	bdl	7.84361	0.16529	1.33403	0.455069	bdl	0.647359	bdl	bdl	0.037585
	58	12.8883	2.41423	171.484	1.77435	153.205	13.1139	90.315	0.23868	6.43701	0.931507	1.53926	0.40536	bdl	0.765503	bdl	bdl	0.0440544
	59	12.322	2.67433	218.283	2.30543	189.876	13.2725	86.8598	bdl	12.5826	1.25112	1.10261	0.781698	0.599442	0.455459	bdl	0.0122901	0.0295496
	60	10.1107	1.44214	120.746	0.994103	127.816	13.1437	85.0108	bdl	8.88609	0.188683	1.57726	0.641903	0.124101	0.434663	bdl	bdl	0.0255231
	61	8.01283	1.77321	228.326	1.17334	116.657	12.6447	88.2192	bdl	12.6646	0.874725	1.69275	0.676614	0.102718	bdl	bdl	0.0131736	bdl
	62	10.2548	1.79985	119.93	0.858957	142.206	13.0186	87.975	bdl	7.6775	bdl	1.71288	0.366679	0.113657	bdl	bdl	bdl	0.011724
	63	11.0863	1.83463	144.23	1.26272	143.429	13.2907	88.9189	bdl	6.86174	0.259422	1.7983	bdl	0.406678	bdl	bdl	bdl	bdl
	64	13.6122	1.5384	119.252	1.25098	119.637	13.3559	87.0841	0.274442	5.6673	0.205335	1.86284	bdl	bdl	0.667259	bdl	bdl	0.0509673
	65	13.3375	1.64727	98.7033	1.22919	157.969	13.0629	90.0754	bdl	3.91056	bdl	1.64241	bdl	bdl	0.406574	0.0814004	bdl	0.0370663
	66	11.6443	1.46894	99.1459	1.2451	161.068	12.7419	89.7737	bdl	5.45118	bdl	1.62819	bdl	bdl	0.400927	bdl	0.0141123	0.0338252
	67	11.0099	1.39283	143.191	1.71248	151.062	13.2446	87.9963	0.261956	5.61867	0.220559	1.35247	bdl	bdl	bdl	0.0462842	bdl	0.0280605
	68	11.4005	1.54867	124.485	1.30063	164.025	13.8811	85.222	bdl	4.13357	bdl	1.82743	0.327575	bdl	0.37164	bdl	bdl	0.0230595
	69	11.6625	1.58036	98.2317	1.17939	161.703	13.2623	88.0454	bdl	5.39495	bdl	1.47144	0.217009	0.0686158	0.463124	bdl	bdl	0.0536416
	70	10.7074	1.51286	132.812	1.25204	148.582	12.5563	83.9254	0.219007	5.0215	bdl	1.34835	bdl	bdl	0.627788	bdl	bdl	0.0602432
	71	10.8322	1.12145	100.649	1.22535	157.57	13.2878	88.8529	bdl	4.50869	bdl	1.87242	bdl	bdl	bdl	bdl	bdl	bdl
	72	11.433	1.63715	102.871	0.670856	144.704	13.0288	87.8678	bdl	5.2655	bdl	1.05028	0.522328	bdl	0.737142	0.0992965	bdl	0.0208834
	73	11.4876	1.62376	142.699	1.56312	169.085	14.5532	86.9263	bdl	5.22157	0.222811	1.56431	bdl	0.124519	bdl	bdl	bdl	0.0340864
	74	11.2823	1.45279	107.395	1.27569	160.581	12.645	87.5646	bdl	4.72325	0.131893	1.79077	bdl	bdl	0.774411	bdl	bdl	0.0250367
	75	10.6154	1.43447	149.086	1.54224	155.918	13.3141	88.103	0.28035	6.57585	0.215779	1.47236	bdl	0.101752	bdl	bdl	bdl	0.0351671
	76	11.0619	1.21681	148.253	1.6515	164.56	12.785	87.6919	bdl	4.11251	bdl	1.72166	bdl	bdl	0.60718	bdl	bdl	bdl
	77	11.2572	1.74345	131.657	1.36839	155.647	13.1666	85.6564	bdl	3.91998	0.228404	1.8049	bdl	0.0547322	bdl	bdl	bdl	0.021322
	78	12.132	1.41176	109.417	1.3125	160.74	13.1329	89.4603	bdl	4.45699	0.195514	1.89001	bdl	bdl	bdl	bdl	bdl	0.0276868
	79	10.9192	1.43516	174.821	1.13215	156.419	13.4225	90.973	bdl	6.56773	0.252732	1.67201	0.282334	0.113307	0.349102	bdl	bdl	0.0265348
	80	13.4213	2.13736	134.358	2.00827	172.987	13.0584	84.9242	bdl	2.57319	bdl	1.79106	0.247355	0.0818107	0.510733	bdl	0.0144878	0.0552548
	81	10.079	1.4584	133.319	1.27301	155.675	13.1901	91.0514	bdl	3.35159	bdl	1.87814	bdl	bdl	bdl	bdl	bdl	bdl
	82	10.3701	1.72093	119.259	1.26307	147.539	12.8145	92.9795	bdl	3.15091	0.120206	1.53421	bdl	0.106382	0.925771	bdl	bdl	0.0408593
	83	10.5117	1.59363	121.888	1.18506	156.326	13.6646	88.9782	bdl	2.69519	bdl	1.60071	bdl	bdl	bdl	bdl	bdl	bdl
	84	11.3805	1.46611	123.644	0.942545	119.624	12.659	89.4532	bdl	3.4819	0.188278	2.02354	0.294219	bdl	bdl	bdl	bdl	bdl
	85	20.2253	4.05847	244.977	3.71594	251.109	13.0852	87.3783	bdl	6.7859	2.20296	1.41753	0.266228	0.411924	0.850984	bdl	bdl	0.275536
	86	19.3624	4.42293	291.188	2.94985	247.494	13.3887	84.5647	0.602121	9.72471	2.89999	2.0762	0.481373	0.747198	bdl	bdl	bdl	0.303799
	87	18.1341	4.40395	287.748	3.94738	257.89	12.4692	90.1518	0.533174	8.5929	3.28171	2.21697	bdl	0.609543	1.22813	bdl	bdl	0.335578
	88	20.2904	4.25384	233.109	3.79491	206.396	13.2983	87.2652	0.357113	4.54578	1.35663	1.72213	0.351213	0.330654	0.997745	bdl	bdl	0.236679
	89	21.4931	5.16464	316.868	4.70679	258.53	13.1922	89.7671	0.438005	4.43776	3.69389	1.65405	0.353589	0.259527	1.42434	bdl	bdl	0.257867
	90	23.1886	5.90642	302.465	9.68246	263.794	13.3654	91.0179	0.293926	2.16194	1.28509	1.94306	bdl	0.110715	0.729431	bdl	bdl	0.355014
	91	18.0539	6.29855	552.272	5.82104	241.077	13.0985	90.5652	0.598489	4.58954	27.0921	1.62894	bdl	0.565264	1.00941	bdl	bdl	0.66151
	92	21.793	6.18212	226.419	9.88391	289.673	13.5069	91.124	bdl	0.978619	1.73454	1.82138	bdl	0.194713	1.39888	bdl	bdl	0.442127
	93	21.4679	7.44681	375.1	5.87178	257.737	13.9455	89.3098	0.474179	2.81764	18.2493	1.98323	bdl	1.09735	1.61644	bdl	bdl	0.556039
	94	7.58573	3.38696	354.823	1.75514	127.179	12.4306	88.586	bdl	8.82041	6.62847	1.49238	0.410249	1.74276	0.650897	bdl	bdl	0.0136119
	95	4.54121	2.19771	423.541	1.41312	103.744	13.9247	90.3198	bdl	29.7216	9.15521	1.66145	3.48271	9.37231	bdl	bdl	bdl	0.0339952
	96	12.8178	5.13899	348.171	2.98955	206.215	14.0837	90.0334	0.365092	21.972	9.73403	2.38978	1.0849	0.989887	0.785619	bdl	bdl	0.131032
Profile bb'	1	11.409	1.71358	112.211	1.27683	170.547	13.2092	91.0535	bdl	3.08552	0.201287	2.08775	bdl	bdl	bdl	bdl	bdl	bdl
	2	10.0704	1.73193	110.251	1.42907	120.697	12.4929	85.8272	0.261577	3.22081	bdl	1.70687	bdl	bdl	0.773651	bdl	bdl	0.0154129
	3	11.9977	1.61516	117.135	1.35627	166.55	11.9642	94.2083	bdl	2.971	bdl	1.58836	bdl	bdl	bdl	bdl	bdl	0.021397
	4	11.066	1.64853	116.165	1.18247	152.126	11.6673	85.2217	0.285196	3.06616	bdl	1.58009	bdl	bdl	bdl	bdl	bdl	0.0373541
	5	11.2949	1.26733	125.128	1.75542	140.248	11.5169	83.0824	bdl	3.51119	0.179679	1.9284	bdl	bdl	0.606114	bdl	bdl	bdl
	6	11.384	1.99094	119.752	1.56722	141.13	13.209	88.1661	0.383082	3.56907	0.232729	2.00326	bdl	bdl	bdl	bdl	bdl	bdl
	7	11.8024	1.51277	121.54	1.34131	149.751	12.4118	82.8019	0.32496	3.80128	0.202017	1.70469	bdl	bdl	bdl	bdl	bdl	0.0303456
	8	11.6037	1.60243	116.137	1.46803	137.202	12.5573	93.0514	bdl	3.6861	0.154794	2.02419	bdl	bdl	bdl	bdl	bdl	0.0349909
	9	11.9895	1.54712	127.489	1.71408	173.545	13.0669	83.3376	bdl	4.13602	0.137727	1.42523	bdl	bdl	0.402488	bdl	bdl	0.0532865
	10	11.4811	1.81522	135.439	1.65265	175.006	12.5704	87.6014	bdl	4.50327	0.238504	2.01726	bdl	bdl	bdl	bdl	bdl	bdl
	11	10.4269	1.72898	133.344	1.67597	135.648	12.351	91.9864	bdl	5.93487	0.237857	1.89055	0.29277	0.0395575	0.608077	bdl	bdl	0.0376354
	12	11.6301	1.77019	128.107	1.35759	147.275	12.7285	90.8232	bdl	3.71368	0.165822	1.81026	bdl	bdl	0.51338	bdl	bdl	0.0541003
	13	10.8831	1.76368	112.449	1.21633	121.235	12.2691	88.4372	bdl	3.81931	0.235933	1.73942	bdl	bdl	0.557397	bdl	bdl	0.034743
	14	10.7579	1.57541	149.342	1.29045	146.324	13.1581	84.4607	0.273231	5.32886	bdl	2.25541	0.285915	bdl	bdl	bdl	bdl	0.0266179
	15	11.0714	2.02141	144.654	0.8975	155.312	13.9964	87.2036	bdl	4.95035	0.302547	1.58082	bdl	bdl	bdl	bdl	bdl	0.0262802
	16	10.2772	1.73844	138.603	1.30001	145.053	12.1314	82.0819	0.293314	5.22883	0.28146	2.63215	bdl	bdl	0.446459	bdl	bdl	0.0314889
	17	10.9122	1.43871	142.718	1.9565	145.389	12.1635	84.4528	bdl	5.5409	bdl	2.31087	bdl	bdl	bdl	bdl	bdl	0.0635143
	18	10.6885	1.48852	148.009	1.54072	139.595	12.9457	86.5549	bdl	5.36475	0.186908	1.96751	bdl	bdl	0.88131	bdl	bdl	0.036373
	19	11.2076	1.63563	140.112	1.37268	133.553	12.6692	88.4525	bdl	6.43031	0.285383	2.04412	0.399171	bdl	0.633679	bdl	bdl	0.0322218
	20	9.69718	1.72251	142.718	1.45179	145.308	12.2191	80.2078	bdl	6.97273	0.162514	1.94667	bdl	0.0326337	0.708598	bdl	bdl	0.0614869
	21	4.47895	bdl	213.895	bdl	50.7759	12.2382	83.9584	bdl	11.0912	90.5271	4.92526	0.911734	1.82715	618.942	bdl	bdl	13.5458
	22	2.39161	0.400988	226.423	bdl	42.2692	12.6532	84.0218	bdl	10.694	34.2611	4.19647	0.383583	0.180929	962.566	bdl	bdl	15.2418
	23	1.57706	bdl	272.356	bdl	27.8915	13.4248	88.995	bdl	14.5437	141.181	4.17347	0.489242	0.667284	579.385	bdl	bdl	18.2993
	24	1.03521	bdl	292.235	bdl	24.2528	13.2208	78.4655	bdl	8.90483	117.19	4.42316	0.304501	0.660525	665.794	bdl	bdl	16.6135
	25	1.73919	bdl	224.673	bdl	30.6337	11.4756	92.6393	bdl	9.95665	92.2502	3.38018	0.659422	0.463455	658.95	bdl	bdl	16.5096
	26	1.44746	0.373758	228.665	bdl	42.0055	13.3075	85.4312	bdl	6.81318	47.3449	4.38998	0.371507	0.166779	801.263	bdl	bdl	16.6756
	27	1.40698	bdl	225.841	bdl	33.7863	13.5355	86.9706	bdl	7.50378	72.481	3.76792	bdl	0.29653	723.573	bdl	bdl	16.9886
	28	1.14016	bdl	230.639	bdl	bdl	12.9927	86.0522	bdl	7.77687	92.9359	4.3686	bdl	0.342758	639.386	bdl	bdl	17.7391
	29	1.14499	0.339318	243.899	0.175042	27.1327	12.8195	89.697	bdl	5.26201	47.3291	4.0105	0.272572	0.200473	789.965	bdl	bdl	14.8399
	30	1.5117	bdl	240.545	bdl	27.1319	13.27	84.0625	bdl	4.04199	58.0983	3.83654	bdl	0.146922	745.129	bdl	bdl	14.4361
	31	1.02744	bdl	276.411	bdl	36.7685	11.6292	89.2988	bdl	5.85667	130.679	3.76233	bdl	0.369206	538.958	bdl	bdl	13.7231
	32	1.11986	bdl	287.8	bdl	33.0467	13.0094	86.7217	bdl	7.18731	92.3974	4.13329	bdl	0.176799	628.476	bdl	bdl	15.4916
	33	bdl	bdl	275.483	bdl	bdl	13.1494	83.9864	bdl	5.09887	75.7517	3.12714	bdl	0.145487	614.442	bdl	bdl	13.4309
	34	bdl	bdl	287.201	bdl	35.5793	12.3806	84.9353	bdl	2.90511	55.5382	3.59839	bdl	0.0931252	699.342	bdl	bdl	12.3797
	35	1.22131	bdl	265.283	bdl	bdl	13.527	91.0139	bdl	3.47522	48.2342	4.5291	bdl	0.122021	725.062	0.0521936	bdl	13.0946
	36	0.905903	bdl	314.256	bdl	bdl	12.3487	83.9763	bdl	5.00274	93.7223	3.87454	bdl	0.334705	638.987	bdl	bdl	13.6545
	37	bdl	bdl	282.248	bdl	bdl	13.1351	96.4326	bdl	5.13464	65.304	4.00748	bdl	bdl	644.188	bdl	bdl	13.357
	38	1.0948	bdl	312.953	bdl	bdl	11.8788	84.0976	bdl	7.62663	136.758	4.31159	bdl	0.831452	537.967	bdl	bdl	13.3505
	39	bdl	0.435275	320.535	bdl	bdl	11.8937	86.0352	bdl	6.26062	147.557	3.45529	0.349789	0.702629	515.862	bdl	bdl	13.3155
	40	0.935972	0.425241	321.826	0.280858	bdl	13.3434	88.5242	bdl	5.36192	138.588	3.62426	0.410859	0.346407	545.924	bdl	bdl	13.9487
	41	bdl	0.574493	331.327	bdl	bdl	13.6654	93.1387	bdl	5.06763	78.9148	3.54957	bdl	0.78994	659.187	bdl	bdl	15.0721
	42	1.89136	bdl	253.569	bdl	42.1156	12.5747	83.1745	bdl	2.72765	34.3143	4.51371	bdl	0.178135	750.045	bdl	bdl	13.8918
	43	1.15778	bdl	263.705	0.22814	bdl	13.2282	84.0112	bdl	1.81956	36.2872	3.72521	bdl	0.100017	756.639	bdl	bdl	14.3738
	44	bdl	bdl	249.426	bdl	37.4633	15.1017	91.7613	bdl	1.76441	39.4421	3.89351	bdl	bdl	791.923	0.0819859	bdl	14.8522
	45	bdl	bdl	251.824	bdl	bdl	12.4636	84.6011	bdl	3.39944	78.6237	3.83863	bdl	0.201313	574.809	bdl	bdl	12.589
	46	0.83346	bdl	283.656	bdl	bdl	13.5128	86.4705	bdl	4.35808	149.142	4.18351	bdl	0.296639	502.93	bdl	bdl	16.3911
	47	0.7802	0.658598	293.728	bdl	31.5	13.7447	86.1199	0.1699	4.49302	136.142	3.90226	bdl	0.366014	512.064	bdl	bdl	15.5467
	48	bdl	0.349613	299.506	bdl	31.8627	12.2512	88.8692	bdl	4.74342	139.034	3.97095	bdl	0.44324	535.239	bdl	bdl	16.4857
	49	1.69969	bdl	273.105	bdl	33.1452	12.0346	87.9441	bdl	3.63383	88.3243	4.26109	bdl	0.224394	609.329	bdl	bdl	16.4481
	50	1.24761	0.360024	314.995	bdl	bdl	13.6375	86.8313	bdl	4.38	89.1212	3.9149	bdl	0.414722	627.738	0.0634886	bdl	16.3515
	51	1.57871	0.353246	255.76	bdl	23.7393	12.9241	90.9033	bdl	3.27892	59.4636	4.75117	bdl	0.209389	663.888	bdl	bdl	16.1983
	52	1.30962	bdl	299.27	bdl	28.1264	12.0839	96.956	bdl	3.58576	100.448	4.3786	bdl	0.351307	602.261	bdl	bdl	16.9745
	53	13.0267	2.6533	260.981	4.53716	177.864	12.4016	89.7135	0.2727	3.14681	0.236965	1.57878	0.151032	bdl	1.37999	bdl	bdl	0.0184879
	54	12.3135	2.85011	246.18	5.35761	195.561	13.2209	82.4228	bdl	2.36616	0.141254	1.73262	bdl	0.0963665	1.35933	bdl	bdl	0.0201415
	55	12.3926	2.41198	236.498	4.78875	182.744	12.4556	87.578	bdl	2.27306	0.247092	2.24629	bdl	bdl	1.2787	bdl	bdl	bdl
	56	13.0854	2.34937	258.104	4.22822	144.531	12.615	89.7859	0.325989	4.19816	0.605936	2.34496	bdl	0.0944131	1.13112	0.127187	bdl	bdl
	57	7.61278	2.16973	323.909	2.16342	108.261	11.5761	90.0756	0.236067	8.51924	3.00173	2.25952	bdl	0.349695	bdl	bdl	bdl	0.0138441
	58	10.5584	2.28286	339.424	4.26072	106.762	12.1918	84.4751	bdl	4.10542	2.13163	2.14337	bdl	0.159928	1.96687	bdl	bdl	0.0451123
	59	16.4205	3.77947	321.073	6.81412	188.271	13.3362	90.2031	bdl	1.64651	0.290214	2.23232	bdl	0.126444	1.19653	bdl	bdl	0.0334132
	60	13.2944	2.94786	408.091	6.51273	164.589	12.9312	85.4467	0.317711	1.66411	1.55666	2.41059	bdl	0.0860961	1.00501	bdl	bdl	0.0176349
	61	14.8684	3.06817	390.711	6.92548	141.383	12.3277	88.419	0.591495	1.09182	1.05555	2.75463	bdl	bdl	1.15791	bdl	bdl	0.0404211
	62	14.8736	3.23175	385.191	6.7205	167.591	13.2935	86.3394	bdl	1.23609	1.15169	2.10277	bdl	0.163254	1.70817	bdl	bdl	0.0464118
	63	12.5687	3.17653	384.371	6.37496	158.249	12.5564	79.2151	bdl	1.43879	1.10461	2.17048	bdl	0.122475	0.899056	bdl	bdl	0.0241789
	64	16.5558	3.32158	324.012	7.30446	200.502	12.982	86.2208	0.471425	0.777687	0.174895	1.78634	bdl	bdl	1.32746	bdl	bdl	0.0109235
NOTES:
1. The analyzed spots of profiles aa' covers only the concentric oscillatory zone, whereas profile bb' cover both the concentirc oscillatory zone (spot no. 1-20 and 53-64) and CL-dark sector zone (spot no. 21-52).
2. bdl = below determination limit.
